**A-175** Room B, 10/17/2000 9:00 AM - 11:00 AM (PS)  
**Randomized Controlled Trial of Balanced Versus Sodium Chloride Based Intravenous Solutions in the Elderly Surgical Patient** *N.J. Wilkes, MD; R. Stephens, MD; R. Woolf, MD; S.V. Mallett, MD; M.G. Mythen, MD, Centre for Anaesthesia, Royal Free and University College London Medical School, London, United Kingdom.* In elderly surgical patients balanced solutions may be superior to saline based fluids

**A-176** Room B, 10/17/2000 9:00 AM - 11:00 AM (PS)  
**Mannitol Induced Dilutional Anemia during Renal Transplantation** *David O. Yablok, MD, Anesthesiology, Ohio State University, Columbus, OH, United States.* Renal transplant patients receive mannitol. This study shows that the mannitol causes a decrease in hematocrit on average 16% despite no blood loss. Mannitol induced a dilutional anemia that must be considered prior to transfusion of blood.

### Clinical Circulation: Coagulation / Transfusion

**A-177** Room B, 10/17/2000 2:00 PM - 4:00 PM (PS)  
**High Doses of Ascorbic Acid Diminish Platelet Loss and Accelerate Return to Normal Following Cardiopulmonary Bypass** *Georg A. Albiez, MD; Dieter U. Preiss, MD, Ph.D.; Eberhard Jaebchen, Prof.Dr.; Meike Cap, MD; Pieter J. Tollenaere, MD, Dept. of Anesthesia, Heart Center, Bad Krozingen, Baden-Wuerttemberg, Germany.* Vit. C in heart surgery diminishes platelet loss and reduces ST-changes during reperfusion.

**A-178** Room B, 10/17/2000 2:00 PM - 4:00 PM (PS)  
**Transfusion of Irradiated Blood from Cell Salvage (CSblood) Does Not Cause Upregulation of Systemic TNF- $\alpha$ , IL-1 $\beta$  and Eotaxin** *Beatrice Beck-Schimmer, M.D.; Brigitte Romero, M.D.; Thomas Pasch, M.D.; Donat R. Spahn, M.D., Institute of Anesthesiology, Zurich, Switzerland.* Transfusion of irradiated CSblood does not increase serum levels of TNF- $\alpha$ , IL-1 $\beta$  and eotaxin in patients.

**A-179** Room B, 10/17/2000 2:00 PM - 4:00 PM (PS)  
**A Prospective, Randomized Study of Preoperative Autologous Donation for Total Hip Replacement** *Dinna B. Billote, MD; Silas N. Glisson, PhD; David Green, MD, PhD; Richard L. Wixson, MD, Northwestern University Medical School, Chicago, IL, United States.* Among non-anemic patients, PAD provides no benefit for THR. PAD increased the likelihood of autotransfusion, wastage of pre-donated units, and costs.

**A-180** Room B, 10/17/2000 2:00 PM - 4:00 PM (PS)  
**The Hemodynamic Effects of the Red Cell Substitute Hemolink™ (o-raffinose cross-linked human hemoglobin) on Vital Signs in Patients Undergoing CABG Surgery** *Davy C.H. Cheng, MD, MSc, FRCPC; A. Ralpb-Edwards, MD; C.D. Mazer, MD; F.J.L. Carmichael, MD, PhD; George P. Biro, MD, PhD, Cardiac Anesthesia and Intensive Care, Toronto General Hospital, University Health Network, Toronto, ON, Canada*

**A-181** Room B, 10/17/2000 2:00 PM - 4:00 PM (PS)  
**Continuous Perfusion of the Ventilated Lungs during CPB Reduces Hemostatic Activation** *Wulf Dietrich, MD, PhD; Peter Tassani, MD; Michael Spannagl, MD; Josef A. Richter, MD, Department of Anesthesiology, German Heart Center Munich, Munich, Germany*

**A-182** Room B, 10/17/2000 2:00 PM - 4:00 PM (PS)  
**Hypercoagulability by Genetic Laboratory and Clinical Outcomes Yields Significant by Divergent Relationships** *Seamus Fanning, Ph.D; Padraig O'Sullivan, Ph.D; Carmel Wall, FFARCI; Steve von Kier, FIPT; David Royston, FRCA, Anaesthesia, Royal Brompton and Harefield NHS Trust, United Kingdom.* Relation between outcome and hypercoagulability showed clinical, lab and genetic profiles differing by method and outcome.

**A-183** Room B, 10/17/2000 2:00 PM - 4:00 PM (PS)  
**Aprotinin Does Not Induce Hypercoagulability in Liver Transplantation** *James Y. Findlay, MChB; Ronald P. Kufner, MD; Mark H. Ereth, MD; Steven R. Rettke, MD, Anesthesiology, Mayo Foundation, Rochester, MN, United States.* In a randomized controlled trial of aprotinin use in liver transplantation no difference in the occurrence of hypercoagulability was found in comparing aprotinin to placebo.

**A-184** Room B, 10/17/2000 2:00 PM - 4:00 PM (PS)  
**O-Raffinose Crosslinked Human Hemoglobin (Hemolink): Effect on Clinical Chemistry in Patients Undergoing Coronary Artery Bypass (CABG) Surgery** *Barry A. Finegan, MB FRCPC; Craig R. Guenther, MD FRCPC; Steven E. Hill, MD; George P. Biro, MD; Lou Carmichael, MD, Anesthesiology and Pain Medicine, University of Alberta, Edmonton, AB, Canada*

**A-185** Room B, 10/17/2000 2:00 PM - 4:00 PM (PS)  
**Effects of Hydroxyethyl Starches on Platelet Function** *Alexander Franz, cm; Peter Braeunlich, cm; Christian Foringer, cm; Sibylle A. Kozek, MD, Anesthesiology and General Intensive Care, University of Vienna, Vienna, Austria.* In contrast to hydroxyethyl starches with a molecular weight of 200 kD and 450 kD, solutions with a molecular weight of 130 kD had no significant antiplatelet effect.

**A-186** Room B, 10/17/2000 2:00 PM - 4:00 PM (PS)  
**Hemoglobin Replacement Therapy with Hemolink™ in Patients Undergoing CABG in Conjunction with Intraoperative Autologous Donation (IAD)** *Jean-Francois Hardy, MD; F.J. Lou Carmichael, MD; George Biro, MD; Raymond Martineau, MD; Jacques Chelly, MD, Anesthesiology, Montreal Heart Institute, Montreal, QC, Canada.* The oxygen carrier Hemolink™ reduces transfusion in CABG patients

**A-187** Room B, 10/17/2000 2:00 PM - 4:00 PM (PS)  
**Acute Normovolemic Hemodilution Does Not Reduce Homologous Blood Transfusion in Cardiac Surgery** *Laurent Hohn; Alexandre Schweizer; Marc Licker; Denis R. Morel, Anesthesiology, University Hospital, Geneva, Switzerland.* Acute normovolemic hemodilution does not lower allogeneic blood transfusion in cardiac surgical patients with no particular bleeding risk factors.

**A-188** Room B, 10/17/2000 2:00 PM - 4:00 PM (PS)  
**Thrombin, Cathepsin G, and Plasmin Activity in Plasma in Cardiac Surgical Patients** *Mutsuhiro Kikura, MD; Akira Suzuki, MD; Shunji Kobayashi, MD; Matsuyuki Doi, MD; Shigehito Sato, MD, Anesthesiology and Intensive Care, Hamamatsu University School of Medicine, Hamamatsu, Japan.* Increases in protease activity with endothelial injury indicate pro-thrombotic after cardiopulmonary bypass.
